# Supplementary material for: How the choice of ethnic indicator influences ethnicity-based inequities in maternal health care in four Latin American countries: who is indigenous?
Source: Springer Nature journal article supplement (doi:10.1186/s12939-020-1136-6), 2020-03-12
Supplement: MOESM1 [file 17793748]

## **Supplementary material**

***Table S1. Definition of indicators.....1***

***Table S2. Spanish survey questions used to ethnic  
identification.....2***

***S3. Poisson regression model .....3***

***Table S4. Maternal health care coverage and  
sociodemographic characteristics (95%IC) according  
indigenous identification criterion by country .....4***

**Table S1. Definition of indicators**

| Indicator                                             | Definition                                                                                                                                                                                                                                                                                                        | Binary variable                                                                                                                            |
|-------------------------------------------------------|-------------------------------------------------------------------------------------------------------------------------------------------------------------------------------------------------------------------------------------------------------------------------------------------------------------------|--------------------------------------------------------------------------------------------------------------------------------------------|
| Before and during pregnancy                           |                                                                                                                                                                                                                                                                                                                   |                                                                                                                                            |
| Contraceptive use in married or living with a partner | Percentage of women aged 15–49 years currently married or in union who are using (or whose partner is using) a modern contraceptive method.                                                                                                                                                                       | 1: If the woman currently married or in union are using (or whose partner is using) a modern contraceptive method<br>0: if doesn't         |
| Antenatal care with a skilled provider                | Percentage of women attended at least once during pregnancy by skilled health personnel for reasons related to the pregnancy.<br>Bolivia: Doctor, nurse and auxiliary nurse.<br>Guatemala: Doctor, nurse and skilled midwife<br>Mexico: Doctor, nurse and skilled midwife<br>Peru: Doctor, obstetrician and nurse | 1: If the woman attended at least once during pregnancy by skilled health personnel for reasons related to the pregnancy.<br>0: if doesn't |
| First antenatal care visit in the first trimester     | Percentage of women with the first antenatal care visit in the first trimester of pregnancy.                                                                                                                                                                                                                      | 1: If the woman had the first antenatal care visit in the first trimester of pregnancy<br>0: if doesn't                                    |
| Antenatal care visits                                 | Percentage of women with four or more antenatal care visits.                                                                                                                                                                                                                                                      | 1: If the woman had four or more antenatal care visits<br>0: if doesn't                                                                    |
| Birth and postpartum period                           |                                                                                                                                                                                                                                                                                                                   |                                                                                                                                            |
| Skilled birth attendance                              | Percentage of livebirths attended by skilled health personnel.<br>Bolivia, Guatemala, Mexico: Doctor and nurse<br>Peru: Doctor, obstetrician and nurse                                                                                                                                                            | 1: If the livebirths were attended by skilled health personnel<br>0: if doesn't                                                            |
| Postpartum care                                       | Percentage of women with postpartum care by any provider or time of occurrence.                                                                                                                                                                                                                                   | 1: If the woman had a postpartum care by any provider or time of occurrence.<br>0: if doesn't                                              |

**Table S2. Spanish survey questions used to ethnic identification**

| Ethnicity identification Questions                              |                                                                                                                                                                                                         | Categorizing                                                                                                                                                                                                                   |                                                  |
|-----------------------------------------------------------------|---------------------------------------------------------------------------------------------------------------------------------------------------------------------------------------------------------|--------------------------------------------------------------------------------------------------------------------------------------------------------------------------------------------------------------------------------|--------------------------------------------------|
|                                                                 |                                                                                                                                                                                                         | Indigenous                                                                                                                                                                                                                     | Reference Group                                  |
| Self-identification (SI) / <i>Autoidentificación</i>            |                                                                                                                                                                                                         | SI                                                                                                                                                                                                                             | Non-SI                                           |
| Bolivia                                                         | <i>¿Se considera perteneciente a algún pueblo indígena / originario como quechua, aymara, guarani u otro?</i>                                                                                           | Quechua, aymara, guaraní, other                                                                                                                                                                                                | Ninguno                                          |
| Guatemala                                                       | <i>Usted, ¿cómo se considera indígena o no indígena?</i>                                                                                                                                                | Indígena                                                                                                                                                                                                                       | No indígena                                      |
|                                                                 | <i>Usted, ¿cómo se considera maya, ladina/mestiza, garífuna, xinca o de otra etnia?</i>                                                                                                                 | Maya, xinca or other ethnia                                                                                                                                                                                                    | Ladina/mestiza, garifuna                         |
| Mexico                                                          | <i>De acuerdo con su cultura, ¿usted se considera indígena?</i>                                                                                                                                         | Si                                                                                                                                                                                                                             | No                                               |
| Peru                                                            | <i>Por sus antepasados y de acuerdo a sus costumbres usted se considera: ¿Quechua?, ¿Aymara?, ¿Nativo o Indígena de la Amazonía?, ¿Negro /Mulato /Zambo /Afro Peruano?, ¿Blanco?, ¿Mestizo?, ¿Otro?</i> | Quechua, aymara, Nativo o Indígena de la Amazonía                                                                                                                                                                              | Negro, Mulato, Afro Peruano, Blanco, Mestizo     |
| Spoken indigenous language (SIL) / <i>Habla lengua indígena</i> |                                                                                                                                                                                                         | SIL                                                                                                                                                                                                                            | Non-SIL                                          |
| Bolivia                                                         | <i>¿Qué idiomas o lenguas habla?</i>                                                                                                                                                                    | Quechua, Aymara, Guaraní, otro nativo                                                                                                                                                                                          | Castellano, extranjero                           |
| Guatemala                                                       | <i>Usted habitualmente, ¿qué idioma habla en su casa?</i>                                                                                                                                               | Kaqchiquel, Q'eqchi, K'iche, Mam, Poqomchi', Tzu'utujil, Q'anjob'al, Ch'orti', Pocomam, Achi, Akateko, Awakateko, Chalchiteko, Chuj, Itza', Ixil, Jakatelteko (Popti'), Mopan, Sakapulteko, Sipakapense, Tektiteko, Usapanteko | Español                                          |
| Mexico                                                          | <i>¿Usted habla alguna lengua indígena?</i>                                                                                                                                                             | Si                                                                                                                                                                                                                             | No                                               |
| Peru                                                            | <i>¿Qué idioma o dialecto hablan habitualmente en su hogar?</i>                                                                                                                                         | Quechua, Aymara, otra lengua aborigen                                                                                                                                                                                          | Castellano, idioma extranjero                    |
| Indigenous household (IH) / <i>Hogar indígena</i>               |                                                                                                                                                                                                         | IH                                                                                                                                                                                                                             | Non-IH                                           |
| Bolivia                                                         | <i>Si el jefe del hogar reporta hablar una lengua indígena</i>                                                                                                                                          | Indigenous household: Quechua, Aymara, Guaraní, otro nativo                                                                                                                                                                    | Non-indigenous household: Castellano, extranjero |
| Mexico                                                          | <i>Si el jefe del hogar reporta hablar una lengua indígena</i>                                                                                                                                          | Indigenous household: Si                                                                                                                                                                                                       | Non-indigenous household: No                     |

### S3. Poisson regression model

When the Poisson regression is applied to binomial data, the association between exposure and outcome is estimated by means of prevalence ratios (PR). In cross-sectional studies, a value of one can be attributed to each participant's follow-up time, as a strategy to obtain PR point estimates, since there is no real follow-up for the participants in this type of studies. In our study since our outcomes are coverage indicators defined as binary variables, under the same approach, we obtained the coverage ratios.

With a Poisson model, we can predict a coverage based on the presence or absence of exposures. The Poisson model with an independent variable ( $X_1$ ):

$$\ln(C) = \beta_0 + \beta_1 X_1$$

Where  $\ln(C)$  is the natural logarithm of the coverage or number of events per unit of observation,  $X_1$  adopts the value of zero "0" in the unexposed group (non-indigenous) and the value of 1 in the exposed group (indigenous). With this formula we can estimate the predicted the coverage for each of the exposure groups:

$$\text{Non- Indigenous coverage: } (C_0) \rightarrow \ln(C_0) = \beta_0 + \beta_1 * 0 = \beta_0 \rightarrow C_0 = e^{\beta_0}$$

$$\text{Indigenous rate: } (C_1) \rightarrow \ln(C_1) = \beta_0 + \beta_1 * 1 = \beta_0 + \beta_1 \rightarrow C_1 = e^{(\beta_0 + \beta_1)}$$

The coverage ratio (CR) can be estimated as a ratio of functions having in the numerator the equation for the category of exposure considered and in the denominator the equation corresponding to the reference group (or not exposed). Thus, for example, the CR for a variable  $X_1$  ( $CR_{X_1}$ ) in multiple models would be estimated as follows:

$$RC_{X_1} = \frac{C_{indigenous}(X_1 = 1)}{C_{non-indigenous}(X_1 = 0)} = \frac{e^{\beta_0} e^{\beta_1(X_1=1)} e^{\beta_2 X_2} e^{\beta_3 X_3} \dots e^{\beta_k X_k}}{e^{\beta_0} e^{\beta_1(X_1=0)} e^{\beta_2 X_2} e^{\beta_3 X_3} \dots e^{\beta_k X_k}} = e^{\beta_1}$$

**Table S4. Maternal health care coverage and sociodemographic characteristics (95%CI) according indigenous identification criterion by country**

| Bolivia                                                    |                              |                        |                                     |                        |                               |                        |                                                                     |                        |
|------------------------------------------------------------|------------------------------|------------------------|-------------------------------------|------------------------|-------------------------------|------------------------|---------------------------------------------------------------------|------------------------|
| Ethnicity Identification criterion<br>(% indigenous women) | Self-identification<br>63.1% |                        | Spoken indigenous language<br>37.7% |                        | Indigenous Household<br>63.2% |                        | Spoken or Self-identification or<br>Indigenous Household<br>80.25 % |                        |
| Coverage maternal healthcare                               | SI                           | Non-SI                 | SIL                                 | Non-SIL                | IH                            | Non-IH                 | Indigenous                                                          | Non-indigenous         |
| Before and during pregnancy                                |                              |                        |                                     |                        |                               |                        |                                                                     |                        |
| Contraceptive use                                          | 27.29<br>(25.83;28.79)       | 47.23<br>(45.09;49.38) | 25.99<br>(24.11;27.97)              | 38.31<br>(36.72;39.92) | 25.40<br>(24.08;26.76)        | 49.37<br>(47.28;51.47) | 30.33<br>(28.96;31.75)                                              | 51.71<br>(48.82;54.59) |
| Antenatal care (skilled provider)                          | 86.53<br>(85.01;87.91)       | 96.34<br>(95.34;97.12) | 87.21<br>(84.95;89.18)              | 91.40<br>(90.25;92.42) | 86.25<br>(84.75;87.63)        | 96.82<br>(95.89;97.54) | 88.43<br>(87.17;89.58)                                              | 97.10<br>(95.86;97.98) |
| First antenatal care visit in 1 <sup>st</sup> trimester    | 65.55<br>(63.59;67.45)       | 73.54<br>(71.43;75.54) | 65.22<br>(62.12;68.20)              | 70.10<br>(68.46;71.69) | 64.15<br>(62.22;66.04)        | 75.63<br>(73.37;77.75) | 67.51<br>(65.85;69.13)                                              | 73.03<br>(69.72;76.11) |
| Four or more antenatal care visits                         | 64.98<br>(62.82;67.08)       | 85.19<br>(83.44;86.78) | 66.55<br>(63.37;69.59)              | 74.94<br>(73.16;76.64) | 64.42<br>(62.29;66.51)        | 86.17<br>(84.46;87.72) | 69.01<br>(67.19;70.78)                                              | 86.31<br>(83.82;88.47) |
| Birth and postpartum period                                |                              |                        |                                     |                        |                               |                        |                                                                     |                        |
| Skilled birth attendant                                    | 65.58<br>(63.47;67.64)       | 91.22<br>(89.67;92.55) | 65.79<br>(62.51;68.93)              | 78.98<br>(77.25;80.61) | 64.95<br>(62.75;67.10)        | 92.35<br>(90.84;93.63) | 70.82<br>(68.93;72.64)                                              | 92.14<br>(90.09;93.79) |
| Postpartum care                                            | 81.26<br>(79.54;82.87)       | 94.37<br>(93.20;95.34) | 81.29<br>(78.53;83.77)              | 88.14<br>(86.83;89.34) | 80.85<br>(79.12;82.47)        | 95.09<br>(93.98;96.00) | 84.03<br>(82.56;85.40)                                              | 94.48<br>(92.79;95.78) |
| Sociodemographic characteristics                           |                              |                        |                                     |                        |                               |                        |                                                                     |                        |
| Age                                                        |                              |                        |                                     |                        |                               |                        |                                                                     |                        |
| 15-19                                                      | 6.64 (5.76;7.63)             | 9.69<br>(8.46;11.08)   | 7.20 (5.91;8.73)                    | 8.00 (7.16;8.93)       | 7.23 (6.38;8.19)              | 8.67<br>(7.49;10.03)   | 6.92 (6.17;7.76)                                                    | 11.17<br>(9.30;13.37)  |
| 20-24                                                      | 18.83<br>(17.44;20.30)       | 25.73<br>(23.77;27.79) | 20.91<br>(18.87;23.11)              | 21.57<br>(20.23;22.97) | 20.74<br>(19.28;22.27)        | 22.46<br>(20.62;24.42) | 20.18<br>(18.93;21.49)                                              | 26.20<br>(23.44;29.16) |
| 25-29                                                      | 25.62<br>(24.01;27.30)       | 26.48<br>(24.22;28.87) | 23.80<br>(21.55;26.22)              | 26.85<br>(25.23;28.55) | 25.17<br>(23.64;26.76)        | 27.26<br>(25.00;29.65) | 25.94<br>(24.55;27.37)                                              | 29.95<br>(22.83;29.34) |
| 30-34                                                      | 20.70<br>(19.23;22.25)       | 19.39<br>(17.60;21.32) | 20.53<br>(18.47;22.75)              | 20.08<br>(18.67;21.57) | 19.56<br>(18.13;21.08)        | 21.34<br>(19.35;23.48) | 20.45<br>(19.11;21.86)                                              | 19.26<br>(16.79;22.01) |
| 35-39                                                      | 15.99<br>(14.59;17.49)       | 12.63<br>(11.07;14.38) | 16.30<br>(14.37;18.45)              | 14.09<br>(12.91;15.35) | 15.10<br>(13.73;16.58)        | 14.15<br>(12.44;16.06) | 15.51<br>(14.28;16.83)                                              | 11.68<br>(9.76;13.90)  |
| 40-44                                                      | 9.26<br>(8.24;10.39)         | 4.80 (3.91;5.89)       | 8.66<br>(7.18;10.41)                | 7.17 (6.32;8.12)       | 9.10<br>(8.07;10.26)          | 5.06 (4.12;6.21)       | 8.30 (7.41;9.28)                                                    | 4.85 (3.72;6.31)       |
| 45-49                                                      | 2.97 (2.42;3.63)             | 1.27 (0.89;1.83)       | 2.60 (1.87;3.59)                    | 2.23 (1.80;2.77)       | 3.09 (2.53;3.78)              | 1.05 (0.72;1.54)       | 2.70 (2.24;3.26)                                                    | 0.88 (0.55;1.41)       |
| Education level                                            |                              |                        |                                     |                        |                               |                        |                                                                     |                        |
| No education                                               | 8.11 (7.06;9.30)             | 1.56 (1.10;2.19)       | 6.67 (5.45;8.13)                    | 5.28 (4.46;6.24)       | 8.51 (7.44;9.71)              | 0.87 (0.59;1.26)       | 6.89 (6.02;7.87)                                                    | 0.84 (0.53;1.33)       |
| Primary                                                    | 56.99<br>(54.94;59.02)       | 38.17<br>(35.84;40.56) | 61.61<br>(58.74;64.40)              | 45.12<br>(43.19;47.05) | 59.29<br>(57.35;61.20)        | 34.21<br>(31.86;36.63) | 53.36<br>(51.54;55.16)                                              | 36.66<br>(33.55;39.88) |
| Secondary                                                  | 25.59<br>(23.92;27.34)       | 40.47<br>(38.10;42.89) | 24.14<br>(21.62;26.85)              | 34.04<br>(32.27;35.87) | 24.29<br>(22.67;26.00)        | 42.72<br>(40.33;45.15) | 28.37<br>(26.84;29.96)                                              | 42.07<br>(38.78;45.43) |
| Higher                                                     | 9.31<br>(8.32;10.40)         | 19.80<br>(17.69;22.08) | 7.59 (6.27;9.15)                    | 15.56<br>(14.26;16.96) | 7.91 (7.03;8.90)              | 22.20<br>(19.92;24.67) | 11.39<br>(10.39;12.46)                                              | 20.43<br>(17.57;23.63) |
| Wealth                                                     |                              |                        |                                     |                        |                               |                        |                                                                     |                        |
| Q1 (poorest)                                               | 30.07<br>(27.77;32.47)       | 9.99<br>(8.64;11.51)   | 31.68<br>(28.02;35.58)              | 18.81<br>(17.27;20.46) | 30.70<br>(28.35;33.14)        | 8.88<br>(7.59;10.36)   | 25.63<br>(23.65;27.72)                                              | 10.62<br>(8.93;12.58)  |
| Q2                                                         | 22.81<br>(21.06;24.66)       | 14.61<br>(12.73;16.72) | 23.71<br>(20.96;26.71)              | 18.11<br>(16.66;19.65) | 23.78<br>(21.98;25.67)        | 12.94<br>(11.26;14.83) | 20.91<br>(19.38;22.52)                                              | 15.25<br>(12.69;18.22) |
| Q3                                                         | 22.26<br>(20.41;24.23)       | 22.89<br>(20.76;25.17) | 20.83<br>(18.33;23.58)              | 23.21<br>(21.62;24.87) | 22.93<br>(21.10;24.87)        | 21.74<br>(19.74;23.89) | 22.94<br>(21.34;24.63)                                              | 20.67<br>(17.91;23.74) |
| Q4                                                         | 16.45<br>(15.03;17.98)       | 25.82<br>(23.53;28.26) | 15.46<br>(13.17;18.06)              | 21.81<br>(20.30;23.40) | 14.96<br>(13.59;16.43)        | 28.40<br>(26.05;30.89) | 18.42<br>(17.07;19.86)                                              | 25.94<br>(22.73;29.42) |
| Q5 (richest)                                               | 8.41 (7.40;9.53)             | 26.69<br>(24.25;29.28) | 8.32<br>(6.81;10.13)                | 18.06<br>(16.53;19.70) | 7.63 (6.67;8.72)              | 28.03<br>(25.47;30.75) | 12.10<br>(10.96;13.33)                                              | 27.52<br>(23.98;31.38) |
| Place of residence                                         |                              |                        |                                     |                        |                               |                        |                                                                     |                        |
| Urban                                                      | 46.82<br>(44.15;49.50)       | 76.45<br>(73.89;78.82) | 43.74<br>(39.58;47.99)              | 63.72<br>(61.39;66.00) | 44.50<br>(41.80;47.23)        | 80.46<br>(78.16;82.58) | 52.71<br>(50.23;55.18)                                              | 78.16<br>(75.03;80.99) |
| Rural                                                      | 53.18<br>(50.50;55.85)       | 23.55<br>(21.18;26.11) | 56.26<br>(52.01;60.42)              | 36.28<br>(34.00;38.61) | 55.50<br>(52.77;58.20)        | 19.54<br>(17.42;21.84) | 47.29<br>(44.82;49.77)                                              | 21.84<br>(19.01;24.97) |
| Marital status                                             |                              |                        |                                     |                        |                               |                        |                                                                     |                        |
| No married                                                 | 13.17<br>(11.98;14.46)       | 17.83<br>(15.97;19.85) | 10.43<br>(8.76;12.38)               | 16.79<br>(15.49;18.18) | 14.47<br>(13.20;15.83)        | 15.60<br>(13.82;17.57) | 13.78<br>(12.70;14.94)                                              | 19.38<br>(16.51;22.61) |
| Married or union                                           | 86.83<br>(85.54;88.02)       | 82.17<br>(80.15;84.03) | 89.57<br>(87.62;91.24)              | 83.21<br>(81.82;84.51) | 85.53<br>(84.17;86.80)        | 84.40<br>(82.43;86.18) | 86.22<br>(85.06;87.30)                                              | 80.62<br>(77.39;83.49) |
| Health insurance                                           |                              |                        |                                     |                        |                               |                        |                                                                     |                        |
| No                                                         | 85.61<br>(84.24;86.88)       | 73.85<br>(71.45;76.11) | 86.24<br>(84.04;88.18)              | 79.15<br>(77.63;80.59) | 86.69<br>(85.37;87.90)        | 71.99<br>(69.71;74.16) | 83.82<br>(82.55;85.01)                                              | 70.94<br>(67.70;73.98) |
| Yes                                                        | 14.39<br>(13.12;15.76)       | 26.15<br>(23.89;28.55) | 13.76<br>(11.82;15.96)              | 20.85<br>(19.41;22.37) | 13.31<br>(12.10;14.63)        | 28.01<br>(25.84;30.29) | 16.18<br>(14.99;17.45)                                              | 29.06<br>(26.02;32.30) |
| Social program                                             |                              |                        |                                     |                        |                               |                        |                                                                     |                        |
| No                                                         | 17.42<br>(15.85;19.11)       | 19.84<br>(17.67;22.20) | 14.41<br>(12.31;16.81)              | 20.00<br>(18.40;21.71) | 15.18<br>(13.70;16.79)        | 23.10<br>(20.72;25.66) | 17.83<br>(16.43;19.34)                                              | 20.38<br>(17.20;23.98) |
| Yes                                                        | 82.58<br>(80.89;84.15)       | 80.16<br>(77.80;82.33) | 85.59<br>(83.19;87.69)              | 80.00<br>(78.29;81.60) | 84.82<br>(83.21;86.30)        | 76.90<br>(74.34;79.28) | 82.17<br>(80.66;83.57)                                              | 79.62<br>(76.02;82.80) |

SI: Self-identification, SIL: Spoken indigenous language, IH: Indigenous household

| Guatemala                                                 |                              |                        |                                     |                        |                                        |                        |
|-----------------------------------------------------------|------------------------------|------------------------|-------------------------------------|------------------------|----------------------------------------|------------------------|
| Ethnicity Identification criteria<br>(% indigenous women) | Self-identification<br>49.7% |                        | Spoken indigenous language<br>28.2% |                        | Spoken or Self-identification<br>50.1% |                        |
| Coverage maternal healthcare                              | SI                           | Non-SI                 | SIL                                 | Non-SIL                | Indigenous                             | Non-indigenous         |
| <b>Before and during pregnancy</b>                        |                              |                        |                                     |                        |                                        |                        |
| Contraceptive use                                         | 40.24<br>(37.97;42.55)       | 59.69<br>(57.77;61.58) | 31.44<br>(28.66;34.36)              | 57.53<br>(55.86;59.18) | 40.11<br>(37.85;42.42)                 | 59.98<br>(58.06;61.88) |
| Antenatal care (skilled provider)                         | 88.82<br>(87.14;90.31)       | 93.78<br>(92.83;94.61) | 86.15<br>(83.57;88.39)              | 93.35<br>(92.46;94.14) | 88.82<br>(87.14;90.31)                 | 93.82<br>(92.87;94.66) |
| First antenatal care visit in 1 <sup>st</sup> trimester   | 64.45<br>(62.56;66.30)       | 76.87<br>(75.16;78.51) | 60.34<br>(57.93;62.70)              | 74.78<br>(73.27;76.24) | 64.44<br>(62.54;66.29)                 | 76.98<br>(75.26;78.60) |
| Four or more antenatal care visits                        | 84.56<br>(82.99;86.01)       | 87.84<br>(86.52;89.05) | 83.64<br>(81.48;85.60)              | 87.22<br>(86.04;88.31) | 84.58<br>(83.02;86.02)                 | 87.85<br>(86.52;89.06) |
| <b>Birth and postpartum period</b>                        |                              |                        |                                     |                        |                                        |                        |
| Skilled birth attendant                                   | 56.87<br>(53.88;59.80)       | 86.74<br>(85.05;88.26) | 40.47<br>(36.88;44.17)              | 84.05<br>(82.49;85.50) | 56.71<br>(53.71;59.65)                 | 87.13<br>(85.46;88.63) |
| <b>Sociodemographic characteristics</b>                   |                              |                        |                                     |                        |                                        |                        |
| <b>Age</b>                                                |                              |                        |                                     |                        |                                        |                        |
| 15-19                                                     | 9.78 (8.84;10.80)            | 9.68 (8.73;10.72)      | 10.95<br>(9.69;12.36)               | 9.25 (8.46;10.10)      | 9.80 (8.87;10.82)                      | 9.65 (8.70;10.70)      |
| 20-24                                                     | 25.80<br>(24.24;27.43)       | 27.63<br>(26.13;29.17) | 24.66<br>(22.62;26.81)              | 27.53<br>(26.24;28.87) | 25.92<br>(24.34;27.56)                 | 27.53<br>(26.04;29.06) |
| 25-29                                                     | 24.27<br>(22.94;25.64)       | 26.63<br>(25.23;28.09) | 22.65<br>(20.94;24.47)              | 26.56<br>(25.34;27.82) | 24.31<br>(22.98;25.70)                 | 26.61<br>(25.19;28.07) |
| 30-34                                                     | 19.31<br>(18.10;20.58)       | 20.46<br>(19.20;21.78) | 18.97<br>(17.41;20.64)              | 20.25<br>(19.20;21.34) | 19.24<br>(18.04;20.51)                 | 20.54<br>(19.27;21.86) |
| 35-39                                                     | 13.18<br>(12.21;14.20)       | 9.86 (9.00;10.80)      | 14.04<br>(12.79;15.38)              | 10.52<br>(9.75;11.34)  | 13.10<br>(12.14;14.13)                 | 9.91 (9.04;10.86)      |
| 40-44                                                     | 6.06<br>(5.36;6.84)          | 4.71<br>(4.03;5.50)    | 6.62<br>(5.70;7.67)                 | 4.90<br>(4.34;5.52)    | 6.03<br>(5.33;6.81)                    | 4.73<br>(4.04;5.52)    |
| 45-49                                                     | 1.60<br>(1.25;2.05)          | 1.03<br>(0.75;1.42)    | 2.11<br>(1.57;2.83)                 | 1.00<br>(0.77;1.30)    | 1.59<br>(1.24;2.04)                    | 1.04<br>(0.75;1.43)    |
| <b>Education level</b>                                    |                              |                        |                                     |                        |                                        |                        |
| No education                                              | 24.67<br>(22.74;26.70)       | 9.89 (8.75;11.16)      | 33.94<br>(31.35;36.63)              | 10.67<br>(9.63;11.81)  | 24.71<br>(22.79;26.74)                 | 9.73 (8.60;10.99)      |
| Primary                                                   | 54.72<br>(52.78;56.65)       | 48.01<br>(45.91;50.12) | 56.04<br>(53.32;58.72)              | 49.50<br>(47.81;51.19) | 54.81<br>(52.89;56.72)                 | 47.87<br>(45.75;50.00) |
| Secondary                                                 | 18.75<br>(17.04;20.59)       | 35.77<br>(33.68;37.92) | 9.76 (8.05;11.80)                   | 34.21<br>(32.49;35.96) | 18.63<br>(16.93;20.46)                 | 36.02<br>(33.92;38.18) |
| Higher                                                    | 1.86<br>(1.43;2.42)          | 6.33<br>(5.48;7.30)    | 0.26<br>(0.13;0.54)                 | 5.62<br>(4.95;6.38)    | 1.85<br>(1.42;2.40)                    | 6.38<br>(5.52;7.36)    |
| <b>Wealth</b>                                             |                              |                        |                                     |                        |                                        |                        |
| Q1 (poorest)                                              | 34.74<br>(31.78;37.83)       | 13.58<br>(11.94;15.41) | 50.65<br>(46.71;54.59)              | 13.66<br>(12.18;15.29) | 34.86<br>(31.90;37.95)                 | 13.30<br>(11.66;15.14) |
| Q2                                                        | 25.30<br>(23.29;27.42)       | 17.53<br>(16.05;19.12) | 29.07<br>(26.47;31.81)              | 18.37<br>(17.02;19.81) | 25.27<br>(23.27;27.40)                 | 17.49<br>(16.00;19.10) |
| Q3                                                        | 19.02<br>(17.25;20.92)       | 21.29<br>(19.70;22.98) | 14.40<br>(12.23;16.89)              | 22.42<br>(20.94;23.98) | 19.05<br>(17.26;20.97)                 | 21.28<br>(19.68;22.97) |
| Q4                                                        | 13.17<br>(11.64;14.86)       | 24.83<br>(23.01;26.75) | 4.66<br>(3.70;5.86)                 | 24.68<br>(23.12;26.31) | 13.08<br>(11.57;14.77)                 | 25.00<br>(23.17;26.93) |
| Q5 (richest)                                              | 7.78<br>(6.57;9.18)          | 22.76<br>(20.86;24.78) | 1.21<br>(0.78;1.88)                 | 20.86<br>(19.19;22.63) | 7.73<br>(6.53;9.13)                    | 22.92<br>(21.01;24.96) |
| <b>Place of residence</b>                                 |                              |                        |                                     |                        |                                        |                        |
| Urban                                                     | 29.83<br>(26.80;33.05)       | 45.92<br>(43.09;48.77) | 18.45<br>(14.58;23.08)              | 45.57<br>(43.09;48.07) | 29.67<br>(26.66;32.88)                 | 46.20<br>(43.35;49.07) |
| Rural                                                     | 70.17<br>(66.95;73.20)       | 54.08<br>(51.23;56.91) | 81.55<br>(76.92;85.42)              | 54.43<br>(51.93;56.91) | 70.33<br>(67.12;73.34)                 | 53.80<br>(50.93;56.65) |
| <b>Marital status</b>                                     |                              |                        |                                     |                        |                                        |                        |
| No married                                                | 11.59<br>(10.54;12.73)       | 16.44<br>(15.23;17.72) | 9.14 (7.81;10.67)                   | 15.95<br>(14.94;17.02) | 11.58<br>(10.54;12.71)                 | 16.49<br>(15.27;17.77) |
| Married or union                                          | 88.41<br>(87.27;89.46)       | 83.56<br>(82.28;84.77) | 90.86<br>(89.33;92.19)              | 84.05<br>(82.98;85.06) | 88.42<br>(87.29;89.46)                 | 83.51<br>(82.23;84.73) |
| <b>Health insurance</b>                                   |                              |                        |                                     |                        |                                        |                        |
| No                                                        | 92.98<br>(91.89;93.93)       | 81.55<br>(79.73;83.25) | 97.81<br>(97.02;98.39)              | 83.08<br>(81.64;84.43) | 93.03<br>(91.95;93.98)                 | 81.42<br>(79.58;83.12) |
| Yes                                                       | 7.02<br>(6.07;8.11)          | 18.45<br>(16.75;20.27) | 2.19<br>(1.61;2.98)                 | 16.92<br>(15.57;18.36) | 6.97<br>(6.02;8.05)                    | 18.58<br>(16.88;20.42) |

SI: Self-identification, SIL: Spoken indigenous language, IH: Indigenous household

| Mexico                                                    |                              |                        |                                    |                        |                        |                        |                                                             |                        |       |
|-----------------------------------------------------------|------------------------------|------------------------|------------------------------------|------------------------|------------------------|------------------------|-------------------------------------------------------------|------------------------|-------|
| Ethnicity Identification criteria<br>(% indigenous women) | Self-identification<br>29.7% |                        | Spoken indigenous language<br>6.9% |                        | Indigenous Household   | 8.5%                   | Spoken or<br>Self-identification or Indigenous<br>Household |                        | 31.9% |
|                                                           | SI                           | Non-SI                 | SIL                                | Non-SIL                |                        |                        | Indigenous                                                  | Non-indigenous         |       |
| <b>Coverage maternal healthcare</b>                       |                              |                        |                                    |                        |                        |                        |                                                             |                        |       |
| <b>Before and during pregnancy</b>                        |                              |                        |                                    |                        |                        |                        |                                                             |                        |       |
| Contraceptive use                                         | 64.61<br>(61.06;68.01)       | 69.22<br>(65.98;72.27) | 57.03<br>(48.82;64.88)             | 68.72<br>(65.97;71.35) | 60.90<br>(54.47;66.97) | 68.55<br>(65.76;71.21) | 65.48<br>(61.93;68.87)                                      | 68.98<br>(65.67;72.11) |       |
| Antenatal care (skilled provider)                         | 96.32<br>(92.68;98.19)       | 99.06<br>(98.53;99.40) | 91.41<br>(81.66;96.22)             | 98.65<br>(97.66;99.23) | 92.97<br>(84.73;96.93) | 98.64<br>(97.63;99.22) | 96.43<br>(93.07;98.19)                                      | 98.97<br>(98.25;99.39) |       |
| First antenatal care visit in 1 <sup>st</sup> trimester   | 81.33<br>(76.31;85.48)       | 84.49<br>(81.19;87.29) | 75.93<br>(68.56;82.03)             | 84.06<br>(81.20;86.56) | 75.49<br>(67.06;82.33) | 84.26<br>(81.30;86.83) | 80.85<br>(76.19;84.79)                                      | 84.79<br>(81.23;87.77) |       |
| Four or more antenatal care visits                        | 91.38<br>(87.61;94.09)       | 95.72<br>(94.16;96.88) | 78.80<br>(68.54;86.39)             | 95.45<br>(94.04;96.55) | 82.28<br>(73.25;88.73) | 95.44<br>(94.06;96.51) | 90.81<br>(87.29;93.42)                                      | 95.96<br>(94.53;97.03) |       |
| <b>Birth and postpartum period</b>                        |                              |                        |                                    |                        |                        |                        |                                                             |                        |       |
| Skilled birth attendant                                   | 94.72<br>(91.65;96.70)       | 99.09<br>(98.62;99.40) | 84.00<br>(74.69;90.33)             | 98.74<br>(97.82;99.28) | 87.92<br>(79.77;93.07) | 98.65<br>(97.70;99.21) | 94.94<br>(92.05;96.82)                                      | 99.04<br>(98.46;99.41) |       |
| Postpartum care                                           | 93.85<br>(91.20;95.74)       | 96.74<br>(95.53;97.63) | 86.51<br>(78.53;91.83)             | 96.59<br>(95.57;97.38) | 89.56<br>(82.24;94.08) | 96.49<br>(95.45;97.30) | 93.98<br>(91.33;95.86)                                      | 96.79<br>(95.62;97.66) |       |
| <b>Sociodemographic characteristics</b>                   |                              |                        |                                    |                        |                        |                        |                                                             |                        |       |
| <b>Age</b>                                                |                              |                        |                                    |                        |                        |                        |                                                             |                        |       |
| 15-19                                                     | 12.41<br>(9.25;16.43)        | 13.58<br>(11.18;16.39) | 9.25<br>(6.31;13.37)               | 13.52<br>(11.47;15.86) | 11.17<br>(7.77;15.81)  | 13.41<br>(11.34;15.79) | 12.50<br>(9.48;16.31)                                       | 13.56<br>(11.11;16.45) |       |
| 20-24                                                     | 32.34<br>(27.70;37.35)       | 33.71<br>(29.43;38.29) | 30.28<br>(23.18;38.46)             | 33.48<br>(29.83;37.35) | 36.68<br>(25.89;49.00) | 32.94<br>(29.41;36.66) | 34.14<br>(28.76;39.97)                                      | 32.84<br>(28.68;37.28) |       |
| 25-29                                                     | 24.98<br>(20.70;29.82)       | 23.10<br>(20.06;26.45) | 19.87<br>(14.55;26.54)             | 23.94<br>(21.31;26.78) | 19.20<br>(13.92;25.89) | 24.07<br>(21.41;26.94) | 24.31<br>(20.10;29.07)                                      | 23.35<br>(20.27;26.74) |       |
| 30-34                                                     | 16.89<br>(13.59;20.80)       | 16.48<br>(13.98;19.32) | 23.34<br>(16.33;32.21)             | 16.06<br>(14.08;18.26) | 14.97<br>(10.24;21.35) | 16.72<br>(14.64;19.04) | 16.09<br>(12.93;19.86)                                      | 16.80<br>(14.25;19.70) |       |
| 35-39                                                     | 8.34<br>(6.07;11.35)         | 9.58<br>(6.63;13.65)   | 8.59<br>(4.97;14.46)               | 9.32<br>(6.94;12.42)   | 11.12<br>(6.30;18.88)  | 9.10<br>(6.72;12.21)   | 8.27<br>(6.08;11.15)                                        | 9.74<br>(6.73;13.90)   |       |
| 40-44                                                     | 4.23 (2.42;7.28)             | 3.47 (2.16;5.52)       | 7.51 (3.99;13.71)                  | 3.45 (2.29;5.16)       | 5.92 (2.97;11.43)      | 3.52 (2.35;5.26)       | 3.92 (2.24;6.78)                                            | 3.63 (2.29;5.73)       |       |
| 45-49                                                     | 0.82 (0.32;2.05)             | 0.07 (0.02;0.24)       | 1.15 (0.43;3.02)                   | 0.23 (0.08;0.63)       | 0.94 (0.35;2.50)       | 0.23 (0.09;0.64)       | 0.76 (0.30;1.91)                                            | 0.08 (0.02;0.25)       |       |
| <b>Education level</b>                                    |                              |                        |                                    |                        |                        |                        |                                                             |                        |       |
| No education                                              | 2.83 (1.69;4.71)             | 0.99 (0.63;1.56)       | 5.66 (3.03;10.36)                  | 1.30 (0.84;1.99)       | 5.31 (2.88;9.62)       | 1.25 (0.80;1.94)       | 2.86 (1.74;4.66)                                            | 1.01 (0.58;1.73)       |       |
| Primary                                                   | 25.44<br>(20.88;30.61)       | 13.33<br>(10.80;16.33) | 44.17<br>(35.90;52.76)             | 14.88<br>(12.54;17.56) | 33.42<br>(24.14;44.20) | 15.34<br>(12.92;18.12) | 24.98<br>(20.46;30.12)                                      | 13.09<br>(10.54;16.13) |       |
| Secondary                                                 | 43.46<br>(38.10;48.97)       | 40.42<br>(36.19;44.79) | 35.20<br>(27.66;43.56)             | 41.83<br>(38.20;45.54) | 44.19<br>(32.86;56.16) | 41.12<br>(37.53;44.81) | 43.83<br>(38.28;49.54)                                      | 40.24<br>(36.04;44.59) |       |
| Higher                                                    | 28.27<br>(23.45;33.65)       | 45.27<br>(40.90;49.71) | 14.97<br>(8.61;24.75)              | 41.99<br>(38.16;45.92) | 17.07<br>(11.65;24.31) | 42.29<br>(38.44;46.23) | 28.33<br>(23.59;33.60)                                      | 45.67<br>(41.32;50.08) |       |
| <b>Wealth</b>                                             |                              |                        |                                    |                        |                        |                        |                                                             |                        |       |
| Q1 (poorest)                                              | 45.80<br>(40.18;51.52)       | 14.85<br>(12.35;17.77) | 70.48<br>(59.22;79.70)             | 20.69<br>(17.77;23.95) | 62.04<br>(47.56;74.65) | 20.58<br>(17.65;23.85) | 44.34<br>(38.54;50.29)                                      | 14.64<br>(12.02;17.71) |       |
| Q2                                                        | 25.93<br>(21.57;30.82)       | 29.48<br>(25.67;33.60) | 19.38<br>(11.94;29.88)             | 29.09<br>(25.89;32.51) | 18.43<br>(12.36;26.58) | 29.35<br>(26.10;32.82) | 25.83<br>(21.67;30.49)                                      | 29.62<br>(25.66;33.92) |       |
| Q3                                                        | 15.34<br>(11.70;19.86)       | 23.47<br>(19.74;27.66) | 5.50 (2.99;9.89)                   | 22.23<br>(19.12;25.69) | 15.63<br>(5.75;36.00)  | 21.59<br>(18.58;24.94) | 16.79<br>(12.21;22.64)                                      | 23.10<br>(19.41;27.24) |       |
| Q4                                                        | 8.64<br>(6.06;12.18)         | 18.71<br>(15.87;21.92) | 3.36 (1.45;7.59)                   | 16.56<br>(14.29;19.11) | 3.65 (1.84;7.10)       | 16.77<br>(14.48;19.35) | 16.77<br>(6.41;12.14)                                       | 18.83<br>(15.95;22.11) |       |
| Q5 (richest)                                              | 4.30 (2.92;6.29)             | 13.49<br>(10.30;17.47) | 1.28 (0.49;3.31)                   | 11.43<br>(8.98;14.44)  | 0.25 (0.03;1.77)       | 11.71<br>(9.22;14.77)  | 4.18 (2.87;6.05)                                            | 13.81<br>(10.55;17.86) |       |
| <b>Place of residence</b>                                 |                              |                        |                                    |                        |                        |                        |                                                             |                        |       |
| Urban                                                     | 59.05<br>(53.07;64.77)       | 81.54<br>(77.17;85.23) | 43.47<br>(30.01;57.96)             | 77.11<br>(72.71;80.98) | 50.19<br>(36.35;63.99) | 77.08<br>(72.66;80.97) | 60.53<br>(54.42;66.32)                                      | 81.47<br>(76.98;85.24) |       |
| Rural                                                     | 40.95<br>(35.23;46.93)       | 18.46<br>(14.77;22.83) | 56.53<br>(42.04;69.99)             | 22.89<br>(19.02;27.29) | 49.81<br>(36.01;63.65) | 22.92<br>(19.03;27.34) | 39.47<br>(33.68;45.58)                                      | 18.53<br>(14.76;23.02) |       |
| <b>Marital status</b>                                     |                              |                        |                                    |                        |                        |                        |                                                             |                        |       |
| No married                                                | 17.01<br>(13.59;21.08)       | 20.28<br>(17.16;23.80) | 12.57<br>(7.71;19.84)              | 19.83<br>(17.23;22.72) | 13.77<br>(8.68;21.15)  | 19.85<br>(17.23;22.75) | 16.81<br>(13.48;20.77)                                      | 20.51<br>(17.34;24.08) |       |
| Married or union                                          | 82.99<br>(78.92;86.41)       | 79.72<br>(76.20;82.84) | 87.43<br>(80.16;92.29)             | 80.17<br>(77.28;82.77) | 86.23<br>(78.85;91.32) | 80.15<br>(77.25;82.77) | 83.19<br>(79.23;86.52)                                      | 79.49<br>(75.92;82.66) |       |
| <b>Health insurance</b>                                   |                              |                        |                                    |                        |                        |                        |                                                             |                        |       |
| No                                                        | 9.76<br>(6.18;15.08)         | 10.67<br>(8.50;13.31)  | 7.33<br>(4.49;11.73)               | 10.65<br>(8.67;13.02)  | 6.59<br>(3.94;10.82)   | 10.78<br>(8.77;13.19)  | 9.44<br>(6.05;14.45)                                        | 10.88<br>(8.63;13.63)  |       |
| Yes                                                       | 90.24<br>(84.92;93.82)       | 89.33<br>(86.69;91.50) | 92.67<br>(88.27;95.51)             | 89.35<br>(86.98;91.33) | 93.41<br>(89.18;96.06) | 89.22<br>(86.81;91.23) | 90.56<br>(85.55;93.95)                                      | 89.12<br>(86.37;91.37) |       |
| <b>Social program</b>                                     |                              |                        |                                    |                        |                        |                        |                                                             |                        |       |
| No                                                        | 68.18<br>(63.05;72.91)       | 83.22<br>(80.01;85.99) | 50.19<br>(39.48;60.88)             | 80.84<br>(77.94;83.43) | 56.85<br>(45.24;67.76) | 80.76<br>(77.81;83.40) | 69.44<br>(64.31;74.13)                                      | 83.07<br>(79.79;85.91) |       |
| Yes                                                       | 31.82<br>(27.09;36.95)       | 16.78<br>(14.01;19.99) | 49.81<br>(39.12;60.52)             | 19.16<br>(16.57;22.06) | 43.15<br>(32.24;54.76) | 19.24<br>(16.60;22.19) | 30.56<br>(25.87;35.69)                                      | 16.93<br>(14.09;20.21) |       |

SI: Self-identification, SIL: Spoken indigenous language, IH: Indigenous household

| Peru                                                      |                              |                        |                                    |                        |                                        |                        |
|-----------------------------------------------------------|------------------------------|------------------------|------------------------------------|------------------------|----------------------------------------|------------------------|
| Ethnicity Identification criteria<br>(% indigenous women) | Self-identification<br>34.0% |                        | Spoken indigenous language<br>6.3% |                        | Spoken or Self-identification<br>34.3% |                        |
| Coverage maternal healthcare                              | SI                           | Non-SI                 | SIL                                | Non-SIL                | Indigenous                             | Non-indigenous         |
| <b>Before and during pregnancy</b>                        |                              |                        |                                    |                        |                                        |                        |
| Contraceptive use                                         | 50.16<br>(48.38;51.95)       | 56.49<br>(54.96;58.00) | 37.56<br>(34.68;40.54)             | 55.53<br>(54.29;56.77) | 50.12<br>(48.34;51.90)                 | 56.54<br>(55.01;58.06) |
| Antenatal care (skilled provider)                         | 96.97<br>(96.04;97.68)       | 97.86<br>(97.36;98.26) | 89.36<br>(84.80;92.68)             | 98.10<br>(97.70;98.43) | 96.78<br>(95.73;97.58)                 | 97.96<br>(97.48;98.35) |
| First antenatal care visit in 1 <sup>st</sup> trimester   | 76.62<br>(75.13;78.04)       | 83.55<br>(82.60;84.46) | 69.35<br>(66.20;72.32)             | 81.98<br>(81.16;82.77) | 76.60<br>(75.13;78.01)                 | 83.60<br>(82.65;84.50) |
| Four or more antenatal care visits                        | 95.24<br>(94.39;95.97)       | 96.68<br>(96.16;97.13) | 90.94<br>(88.56;92.85)             | 96.54<br>(96.09;96.94) | 95.24<br>(94.39;95.96)                 | 96.68<br>(96.16;97.14) |
| <b>Birth and postpartum period</b>                        |                              |                        |                                    |                        |                                        |                        |
| Skilled birth attendant                                   | 93.26<br>(92.00;94.34)       | 94.11<br>(93.17;94.92) | 79.79<br>(74.39;84.29)             | 94.76<br>(94.01;95.41) | 92.96<br>(91.58;94.14)                 | 94.27<br>(93.34;95.07) |
| Postpartum care                                           | 97.24<br>(96.45;97.86)       | 97.58<br>(96.92;98.10) | 90.46<br>(86.55;93.32)             | 97.93<br>(97.42;98.34) | 97.12<br>(96.23;97.80)                 | 97.65<br>(96.99;98.16) |
| <b>Sociodemographic characteristics</b>                   |                              |                        |                                    |                        |                                        |                        |
| <b>Age</b>                                                |                              |                        |                                    |                        |                                        |                        |
| 15-19                                                     | 5.44<br>(4.81;6.14)          | 5.04<br>(4.53;5.60)    | 8.65 (7.11;10.47)                  | 4.94<br>(4.54;5.38)    | 5.60<br>(4.96;6.32)                    | 4.95<br>(4.45;5.50)    |
| 20-24                                                     | 18.89<br>(17.73;20.10)       | 19.07<br>(18.14;20.04) | 21.70<br>(19.13;24.50)             | 18.83<br>(18.06;19.62) | 18.94<br>(17.77;20.16)                 | 19.04<br>(18.11;20.01) |
| 25-29                                                     | 23.46<br>(22.16;24.82)       | 23.50<br>(22.44;24.60) | 20.62<br>(18.37;23.08)             | 23.68<br>(22.80;24.58) | 23.36<br>(22.06;24.70)                 | 23.56<br>(22.49;24.66) |
| 30-34                                                     | 24.15<br>(22.69;25.67)       | 22.75<br>(21.66;23.89) | 16.86<br>(14.73;19.23)             | 23.65<br>(22.72;24.61) | 24.02<br>(22.57;25.53)                 | 22.81<br>(21.71;23.95) |
| 35-39                                                     | 16.19<br>(15.06;17.39)       | 18.26<br>(17.20;19.37) | 17.10<br>(15.14;19.26)             | 17.59<br>(16.74;18.47) | 16.23<br>(15.10;17.42)                 | 18.25<br>(17.19;19.36) |
| 40-44                                                     | 9.47 (8.57;10.45)            | 9.05<br>(8.34;9.81)    | 11.57<br>(9.84;13.56)              | 9.03<br>(8.45;9.66)    | 9.46 (8.57;10.44)                      | 9.05<br>(8.34;9.82)    |
| 45-49                                                     | 2.41<br>(1.98;2.92)          | 2.33<br>(1.95;2.77)    | 3.50<br>(2.46;4.96)                | 2.28<br>(1.97;2.62)    | 2.40<br>(1.97;2.91)                    | 2.33<br>(1.95;2.78)    |
| <b>Education level</b>                                    |                              |                        |                                    |                        |                                        |                        |
| No education                                              | 2.51<br>(2.08;3.03)          | 1.03<br>(0.81;1.31)    | 6.76<br>(5.22;8.71)                | 1.19<br>(0.99;1.41)    | 2.60<br>(2.15;3.13)                    | 0.98<br>(0.76;1.25)    |
| Primary                                                   | 24.20<br>(22.80;25.66)       | 18.64<br>(17.31;20.04) | 54.34<br>(51.25;57.40)             | 18.27<br>(17.23;19.36) | 24.39<br>(22.99;25.86)                 | 18.50<br>(17.18;19.91) |
| Secondary                                                 | 49.82<br>(48.06;51.58)       | 45.26<br>(43.75;46.77) | 34.59<br>(31.48;37.84)             | 47.62<br>(46.35;48.90) | 49.70<br>(47.93;51.47)                 | 45.30<br>(43.79;46.81) |
| Higher                                                    | 23.47<br>(21.88;25.13)       | 35.08<br>(33.41;36.77) | 4.31<br>(3.08;6.00)                | 32.92<br>(31.57;34.30) | 23.31<br>(21.73;24.97)                 | 35.22<br>(33.55;36.93) |
| <b>Wealth</b>                                             |                              |                        |                                    |                        |                                        |                        |
| Q1 (poorest)                                              | 28.18<br>(26.28;30.15)       | 16.86<br>(15.30;18.55) | 76.25<br>(72.50;79.64)             | 17.00<br>(15.80;18.27) | 28.58<br>(26.65;30.60)                 | 16.59<br>(15.02;18.29) |
| Q2                                                        | 28.22<br>(26.47;30.03)       | 20.86<br>(19.52;22.27) | 17.67<br>(14.96;20.76)             | 23.74<br>(22.52;25.01) | 28.01<br>(26.27;29.82)                 | 20.93<br>(19.59;22.34) |
| Q3                                                        | 20.33<br>(18.83;21.91)       | 21.78<br>(20.53;23.09) | 3.98 (2.48;6.33)                   | 22.44<br>(21.37;23.55) | 20.29<br>(18.81;21.86)                 | 21.81<br>(20.56;23.12) |
| Q4                                                        | 14.47<br>(13.12;15.93)       | 20.42<br>(19.18;21.71) | 1.27<br>(0.63;2.52)                | 19.54<br>(18.49;20.63) | 14.39<br>(13.05;15.84)                 | 20.49<br>(19.25;21.79) |
| Q5 (richest)                                              | 8.81 (7.54;10.27)            | 20.08<br>(18.37;21.89) | 0.83<br>(0.28;2.43)                | 17.28<br>(15.87;18.78) | 8.73 (7.47;10.18)                      | 20.18<br>(18.47;22.00) |
| <b>Place of residence</b>                                 |                              |                        |                                    |                        |                                        |                        |
| Urban                                                     | 64.02<br>(61.74;66.23)       | 79.67<br>(77.73;81.48) | 19.38<br>(15.93;23.36)             | 78.02<br>(76.58;79.39) | 63.68<br>(61.38;65.91)                 | 79.93<br>(77.97;81.75) |
| Rural                                                     | 35.98<br>(33.77;38.26)       | 20.33<br>(18.52;22.27) | 80.62<br>(76.64;84.07)             | 21.98<br>(20.61;23.42) | 36.32<br>(34.09;38.62)                 | 20.07<br>(18.25;22.03) |
| <b>Marital status</b>                                     |                              |                        |                                    |                        |                                        |                        |
| No married                                                | 13.01<br>(12.00;14.10)       | 16.70<br>(15.73;17.71) | 12.76<br>(10.86;14.95)             | 15.62<br>(14.87;16.41) | 13.09<br>(12.08;14.18)                 | 16.67<br>(15.70;17.69) |
| Married or union                                          | 86.99<br>(85.90;88.00)       | 83.30<br>(82.29;84.27) | 87.24<br>(85.05;89.14)             | 84.38<br>(83.59;85.13) | 86.91<br>(85.82;87.92)                 | 83.33<br>(82.31;84.30) |
| <b>Health insurance</b>                                   |                              |                        |                                    |                        |                                        |                        |
| No                                                        | 14.94<br>(13.77;16.19)       | 16.07<br>(15.07;17.11) | 8.45 (6.41;11.06)                  | 16.17<br>(15.35;17.02) | 14.99<br>(13.81;16.24)                 | 16.05<br>(15.05;17.10) |
| Yes                                                       | 85.06<br>(83.81;86.23)       | 83.93<br>(82.89;84.93) | 91.55<br>(88.94;93.59)             | 83.83<br>(82.98;84.65) | 85.01<br>(83.76;86.19)                 | 83.95<br>(82.90;84.95) |
| <b>Social program</b>                                     |                              |                        |                                    |                        |                                        |                        |
| No                                                        | 81.50<br>(79.94;82.97)       | 89.22<br>(87.95;90.37) | 51.81<br>(47.54;56.04)             | 88.92<br>(87.93;89.83) | 81.28<br>(79.68;82.77)                 | 89.38<br>(88.10;90.53) |
| Yes                                                       | 18.50<br>(17.03;20.06)       | 10.78 (9.63;12.05)     | 48.19<br>(43.96;52.46)             | 11.08<br>(10.17;12.07) | 18.72<br>(17.23;20.32)                 | 10.62<br>(9.47;11.90)  |

SI: Self-identification, SIL: Spoken indigenous language, IH: Indigenous household
